# Supplementary material for: MerlinS13 phosphorylation regulates meningioma Wnt signaling and magnetic resonance imaging features
Source: PubMed Central journal article supplement (PMC11383945; doi:10.1038/s41467-024-52284-8), 2024-09-09
Supplement: 41467_2024_52284_MOESM1_ESM.pdf [file 41467_2024_52284_MOESM1_ESM.pdf]

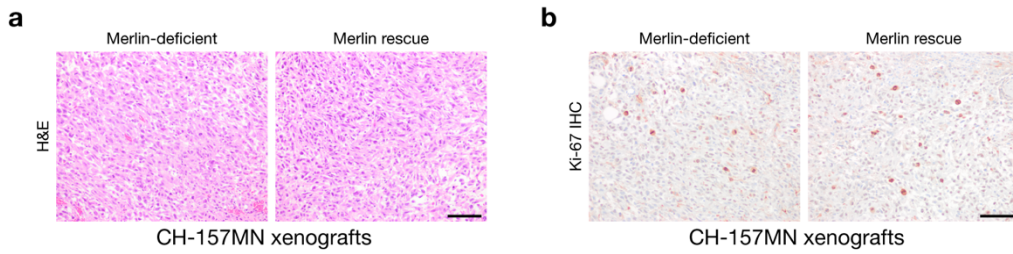

**Supplementary Fig. 1. CH-157MN xenograft model of Merlin-deficient or Merlin rescue meningiomas. a-b,** Images of H&E staining **a** or Ki-67 immunohistochemistry **b** from CH-157MN meningioma xenografts in NU/NU mice with or without doxycycline-inducible Merlin-rescue. Images are representative of n=3 xenografts/condition. Scale bars, 100  $\mu$ m. Source data are provided as a Source Data file.

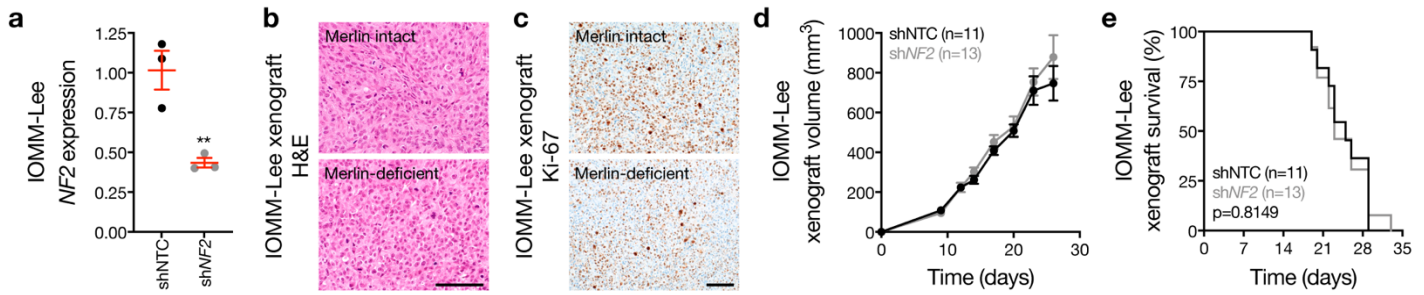

**Supplementary Fig. 2. IOMM-Lee xenograft model of Merlin intact or Merlin-deficient meningiomas.** **a**, QPCR for *NF2* in IOMM-Lee meningioma cells expressing non-targeted control shRNAs (shNTC) or shRNAs suppressing *NF2*. n=3 biological replicates per condition. **b-c**, Images of H&E staining **b** or Ki-67 immunohistochemistry **c** from IOMM-Lee meningioma xenografts in NU/NU mice with or without shRNA suppression of *NF2*. Images are representative of n=3 xenografts/condition. Scale bars, 100  $\mu$ m. **d**, IOMM-Lee xenograft measurements in NU/NU mice with or without shRNA suppression of *NF2*. n=12 mice with shNTC and 13 mice with shNF2. **e**, Kaplan-Meier survival curve for IOMM-Lee xenograft overall survival in NU/NU mice as in **d** (log-rank test). n=12 mice with shNTC and 13 mice with shNF2. Lines represent means, and error bar represent standard error of the means. \*\*P $\leq$ 0.01 (Student's t-test, one sided). Source data are provided as a Source Data file.

**a**

| Sample number | Sample identifier | Condition        | C1          | C2          | C3          | C4          | C5          | C6          | C7          | C8          | C9          | C10         | C11         | C12         | C13        | C14        | C15        | C16        | C17        | Total        |
|---------------|-------------------|------------------|-------------|-------------|-------------|-------------|-------------|-------------|-------------|-------------|-------------|-------------|-------------|-------------|------------|------------|------------|------------|------------|--------------|
| 1             | 241_10            | Merlin-deficient | 669         | 323         | 482         | 344         | 480         | 478         | 578         | 302         | 654         | 162         | 318         | 233         | 33         | 55         | 63         | 76         | 78         | 5328         |
| 3             | 241_3             | Merlin-deficient | 380         | 461         | 378         | 335         | 416         | 420         | 377         | 307         | 270         | 250         | 203         | 186         | 50         | 62         | 64         | 35         | 26         | 4220         |
| 4             | 241_4             | Merlin-deficient | 97          | 352         | 124         | 150         | 78          | 157         | 168         | 183         | 181         | 74          | 96          | 30          | 82         | 93         | 32         | 12         | 16         | 1925         |
| 8             | 287_2             | Merlin-deficient | 149         | 230         | 124         | 195         | 56          | 120         | 52          | 172         | 83          | 55          | 103         | 52          | 36         | 31         | 7          | 23         | 7          | 1495         |
| 9             | 287_3             | Merlin-deficient | 290         | 213         | 228         | 262         | 120         | 147         | 130         | 158         | 98          | 44          | 81          | 48          | 57         | 34         | 14         | 24         | 10         | 1958         |
| 2             | 241_2             | Merlin rescue    | 259         | 137         | 272         | 152         | 170         | 110         | 153         | 88          | 100         | 200         | 87          | 81          | 3          | 12         | 11         | 7          | 14         | 1856         |
| 5             | 241_5             | Merlin rescue    | 588         | 385         | 550         | 417         | 602         | 570         | 634         | 405         | 380         | 291         | 219         | 370         | 54         | 17         | 65         | 47         | 61         | 5655         |
| 6             | 241_6             | Merlin rescue    | 663         | 840         | 440         | 809         | 488         | 605         | 603         | 545         | 330         | 249         | 202         | 293         | 172        | 39         | 55         | 45         | 43         | 6421         |
| 7             | 241_8             | Merlin rescue    | 482         | 711         | 519         | 327         | 377         | 364         | 337         | 459         | 369         | 171         | 259         | 147         | 57         | 137        | 50         | 57         | 35         | 4858         |
| 10            | 287_4             | Merlin rescue    | 402         | 265         | 252         | 246         | 382         | 182         | 171         | 146         | 145         | 70          | 134         | 95          | 119        | 69         | 35         | 29         | 19         | 2761         |
| 11            | 287_5             | Merlin rescue    | 147         | 102         | 160         | 119         | 116         | 87          | 53          | 64          | 137         | 27          | 70          | 38          | 10         | 64         | 12         | 18         | 9          | 1233         |
| 12            | 287_6             | Merlin rescue    | 384         | 243         | 180         | 299         | 233         | 184         | 147         | 161         | 129         | 664         | 86          | 120         | 103        | 48         | 19         | 42         | 13         | 3055         |
|               |                   | <b>Total</b>     | <b>4510</b> | <b>4262</b> | <b>3709</b> | <b>3655</b> | <b>3518</b> | <b>3424</b> | <b>3403</b> | <b>2990</b> | <b>2876</b> | <b>2257</b> | <b>1858</b> | <b>1693</b> | <b>776</b> | <b>661</b> | <b>427</b> | <b>415</b> | <b>331</b> | <b>40765</b> |

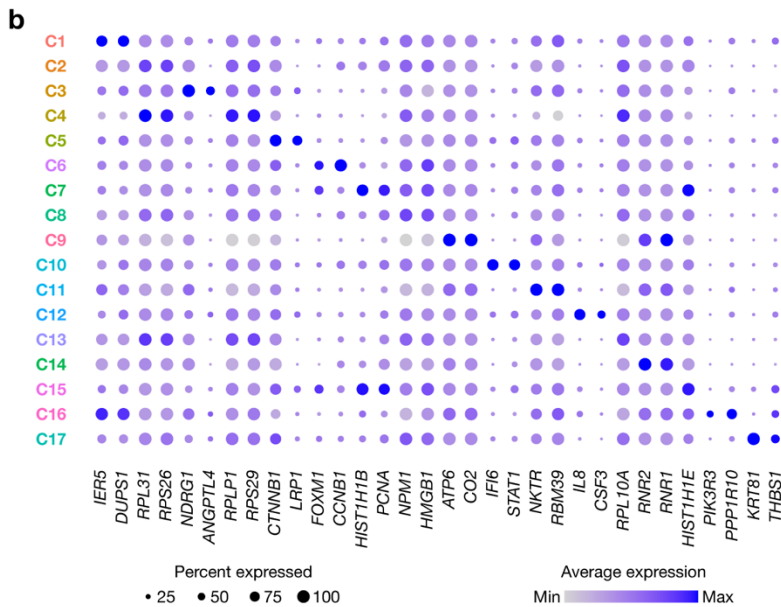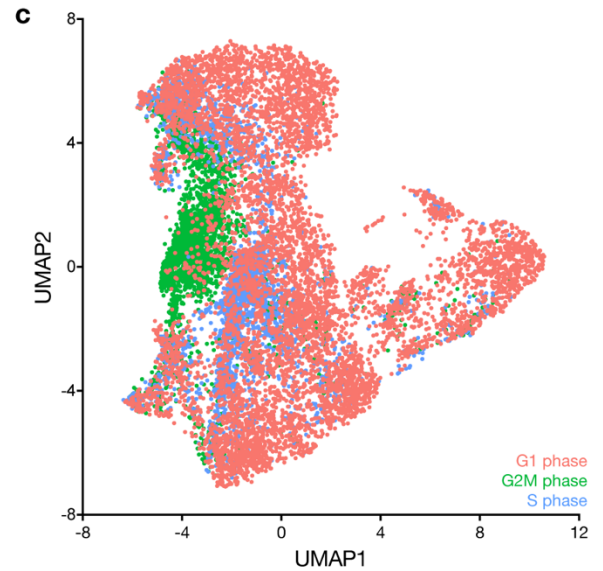

**Supplementary Fig. 3. Single-cell RNA sequencing of CH-157MN xenograft models of Merlin-deficient or Merlin rescue meningiomas.** **a**, Single-cell RNA sequencing of CH-157MN meningioma xenografts in NU/NU mice with or without Merlin rescue identifies 17 cell states. Table shows number of cells per sample contributing to each cell state colored by assignments from Louvain clustering. **b**, Dot plot of single-cell RNA sequencing showing marker genes for each cell state cluster. **c**, Uniform manifold approximation and projection (UMAP) of single-cell RNA sequencing transcriptomes of 40,765 CH-157MN cells from 12 xenografts as in **Fig. 1a-c** showing cell cycle distribution. Source data are provided as a Source Data file.

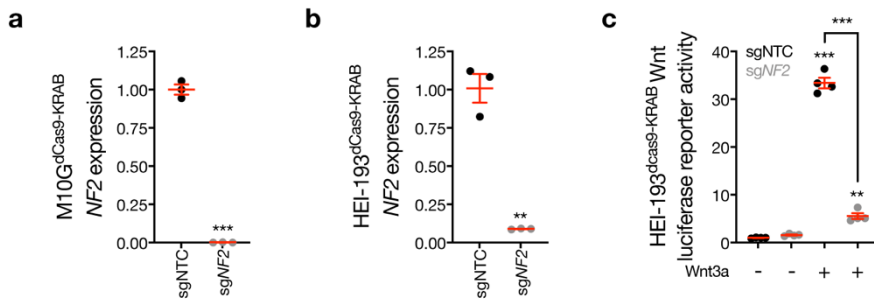

**Supplementary Fig. 4. Merlin suppression inhibits Wnt signaling.** **a**, QPCR for *NF2* in M10G<sup>dCas9-KRAB</sup> meningioma cells expressing non-targeted control sgRNAs (sgNTC) or sgRNAs suppressing *NF2* (sgNF2). n=3 biological replicates per condition. **b**, QPCR for *NF2* in HEI-193<sup>dCas9-KRAB</sup> schwannoma cells expressing sgNTC or sgNF2. n=3 biological replicates per condition. **c**, TOP-Flash Tcf/Lef luciferase reporter assay in HEI-193<sup>dCas9-KRAB</sup> schwannoma cells expressing sgNTC or sgNF2 with or without 24-hours of Wnt3a treatment (100ng/μl). n=4 biological replicates per condition. Lines represent means, and error bar represent standard error of the means. \*\*P≤0.01, \*\*\*P≤0.0001 (Student's t-test, one sided). Source data are provided as a Source Data file.

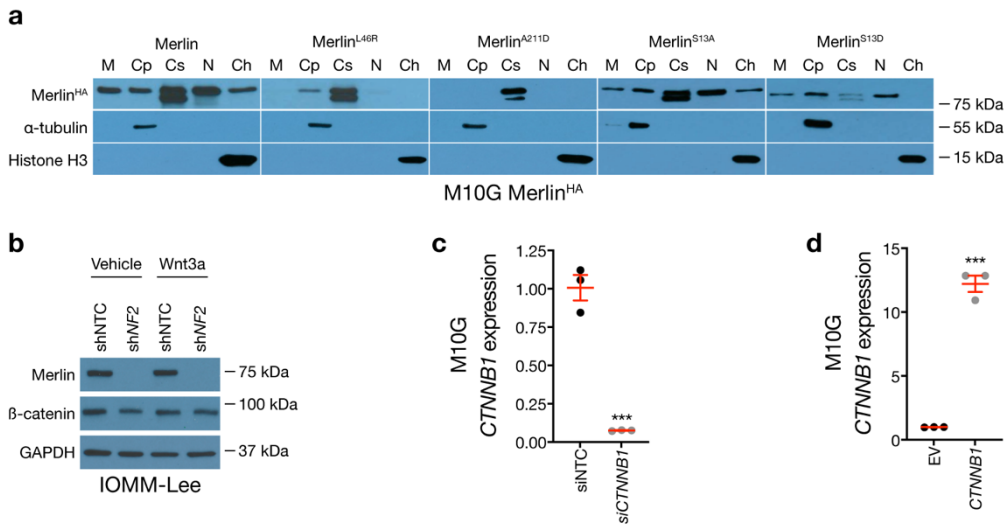

**Supplementary Fig. 5. Genetic perturbation of Merlin or  $\beta$ -catenin in meningioma cells.** **a**, Immunoblots for HA (Merlin) after biochemical fractionation of M10G meningioma cells overexpressing Merlin constructs. Immunoblots for  $\alpha$ -tubulin or histone H3 mark cytoplasmic or chromatin fractions, respectively. Representative of 4 biological replicates. **b**, Immunoblots for Merlin,  $\beta$ -catenin, or GAPDH in IOMM-Lee meningioma cells expressing non-targeted control shRNAs (shNTC) or shRNAs suppressing *NF2* (sh*NF2*) with or without 24-hours of Wnt3a treatment (100ng/ul). Representative of 3 biological replicates. **c**, QPCR for  $\beta$ -catenin (*CTNNB1*) in M10G meningioma cells expressing non-targeted control siRNAs (siNTC) or siRNAs suppressing  $\beta$ -catenin (si*CTNNB1*).  $n=3$  biological replicates per condition. **d**, QPCR for  $\beta$ -catenin (*CTNNB1*) in M10G meningioma cells with or without  $\beta$ -catenin overexpression.  $n=3$  biological replicates per condition. Lines represent means, and error bar represent standard error of the means. \*\*\* $P \leq 0.0001$  (Student's t-test, one sided). Source data are provided as a Source Data file.

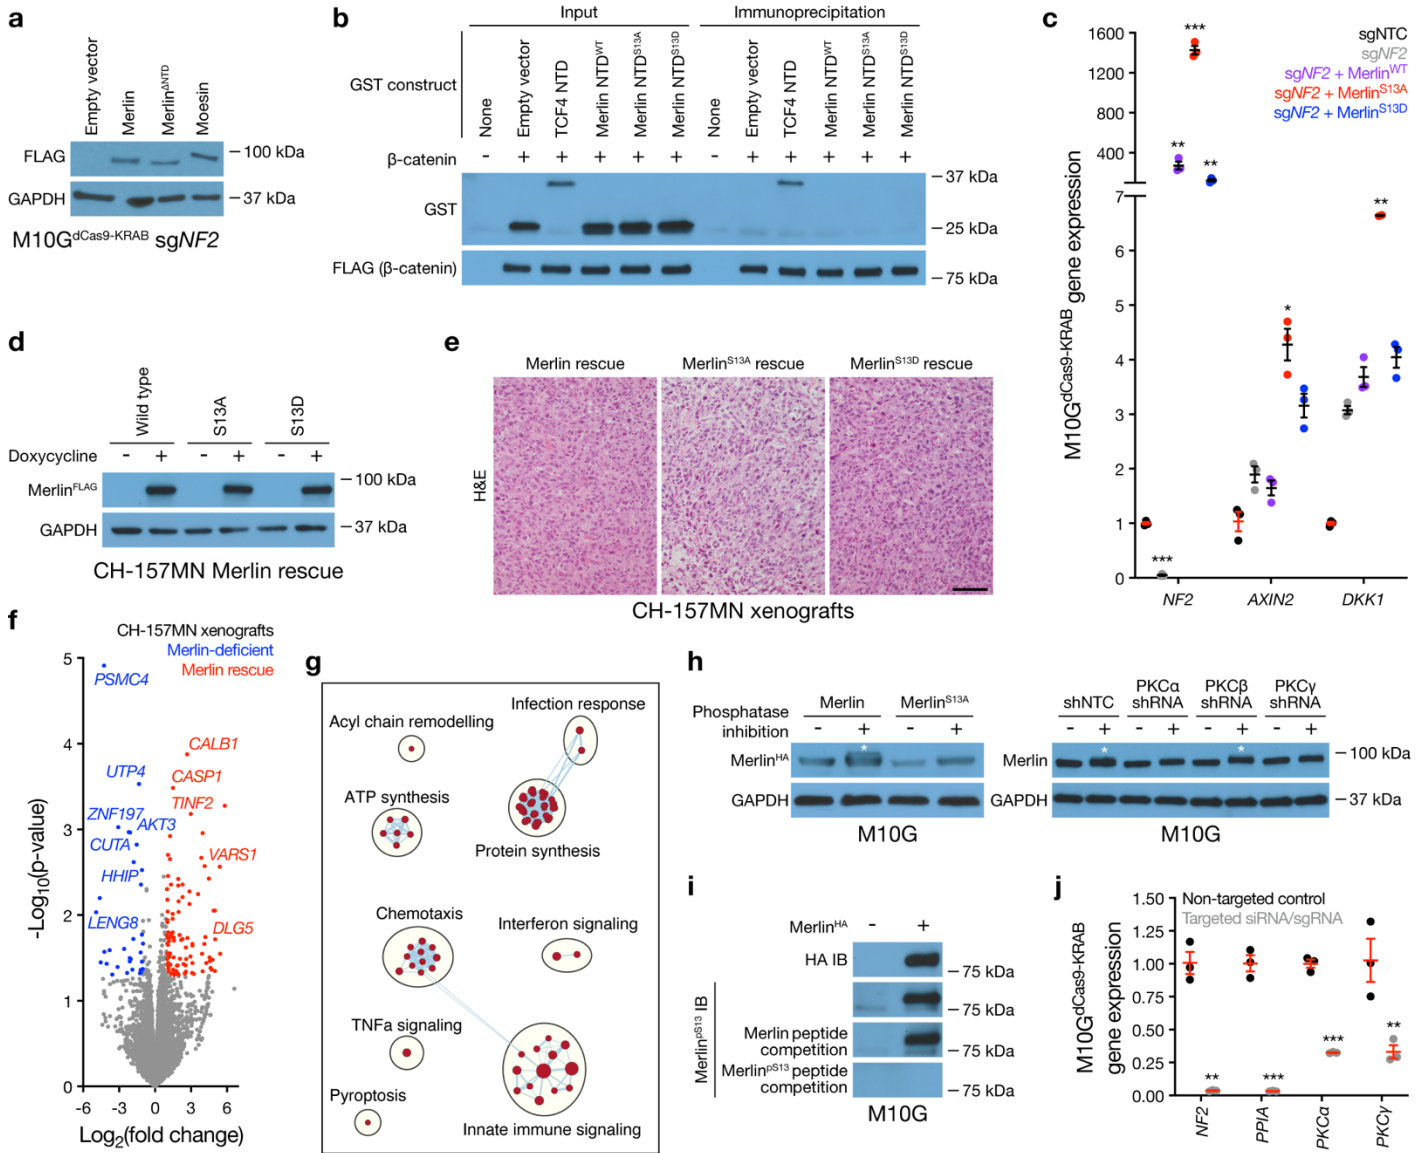

**Supplementary Fig. 6. PKC and PP1A regulate Merlin Serine 13 phosphorylation.** **a**, Immunoblots for FLAG (Merlin constructs or Moesin) or GAPDH in M10G<sup>dCas9-KRAB</sup> meningioma cells expressing sgRNAs suppressing *NF2* (sg*NF2*) with or without rescue of Merlin constructs or overexpression of the FERM family member Moesin. Representative of 3 biological replicates. **b**, *In vitro* recombinant protein binding assay between truncated GST constructs (top immunoblot) and full-length β-catenin with a FLAG tag (bottom immunoblot). The 54 residues of the TCF4 N-terminal domain (NTD) were used as a positive control for binding to β-catenin, and conditions without prey protein or GST only (Empty vector) were used as negative controls. Result show that the 19 residues of the Merlin NTD are not sufficient for binding to β-catenin, irrespective of unphosphorylatable or phosphomimetic substitutions at S13. These data suggest that the tertiary structure of Merlin (or intermediate proteins that may facilitate interaction) may be necessary for binding to β-catenin. Representative of 3 biological replicates. **c**, QPCR for the genes indicated on the x-axis in M10G<sup>dCas9-KRAB</sup> meningioma cells expressing non-targeted control sgRNAs (sgNTC), sgRNAs suppressing *NF2* (sg*NF2*), or sg*NF2* with rescue of Merlin wildtype (WT), S13A, or S13D constructs. Significance is shown compared to sgNTC for *NF2* expression across all conditions or compared to all other conditions for *AXIN1* or *DKK1* expression with S13A rescue. n=4 biological replicates per condition. **d**, Immunoblots for FLAG (Merlin) or GAPDH in CH-157MN meningioma cells with or without 24-hours of doxycycline-inducible Merlin rescue (20μg/ml). Representative of 3 biological replicates. **e**, Images of H&E staining CH-157MN xenografts in NU/NU mice with doxycycline-inducible Merlin-rescue. Images are representative of n=3 xenografts/condition. Scale bars, 100 μm. **f**, Volcano plot showing differentially expressed genes from bulk RNA sequencing of CH-157MN meningioma xenografts without (blue, n=3) versus with (red, n=4) doxycycline-inducible Merlin rescue. **g**, Network of gene circuits distinguishing CH-157MN meningioma xenografts with (n=4) versus without (n=3) doxycycline-inducible Merlin rescue using RNA sequencing. Nodes represent pathways and edges represent shared genes between pathways (P≤0.01,

FDR $\leq$ 0.01). **h**, Immunoblots of HA (Merlin), endogenous Merlin or GAPDH in M10G meningioma cells with or without (1) phosphatase inhibition, (2) doxycycline-inducible Merlin overexpression, or (3) expression of non-targeted control shRNAs (shNTC) or shRNAs suppressing PKC isoforms. Asterisks show doublets suggestive of phosphorylation events. Representative of 3 biological replicates. **i**, Immunoblots (IB) for HA (Merlin, top) or Merlin S13 phosphorylation (Merlin<sup>pS13</sup>) after Merlin overexpression. The bottom three immunoblots were incubated in 4 $\mu$ g primary phospho-specific Merlin S13 antibody with or without spike-in of synthetic Merlin peptides used for rabbit immunization during phospho-specific antibody generation. Antibody incubations with no peptide (second from top), phospho-peptides (bottom blot, CSRMSFS(pS)LKRRKQP-amide, 20 $\mu$ g) or unphosphorylated peptides (second to bottom blot, CSRMSFSSLKRRKQP-amide, 20 $\mu$ g) show competition for Merlin<sup>pS13</sup> binding only when Merlin<sup>pS13</sup> antibody is incubated with phosphorylated peptide. Representative of 3 biological replicates. **j**, QPCR for the genes indicated on the x-axis in M10G<sup>dCas9-KRAB</sup> meningioma cells expressing non-targeted control sgRNAs or siRNAs, sgRNAs suppressing *NF2* (sg*NF2*, first pair), or siRNAs suppressing PP1A or PKC isoforms (second through fourth pairs). Expression of genes of interest in experimental conditions were compared to appropriate non-targeted control sgRNAs (for *NF2* suppression using sgRNAs) or siRNAs (for PP1A and PKC isoform suppression using siRNAs). n=3 biological replicates per condition. Lines represent means, and error bar represent standard error of the means. \*P $\leq$ 0.05, \*\*P $\leq$ 0.01, \*\*\*P $\leq$ 0.0001 (Student's t-test, one sided). Source data are provided as a Source Data file.

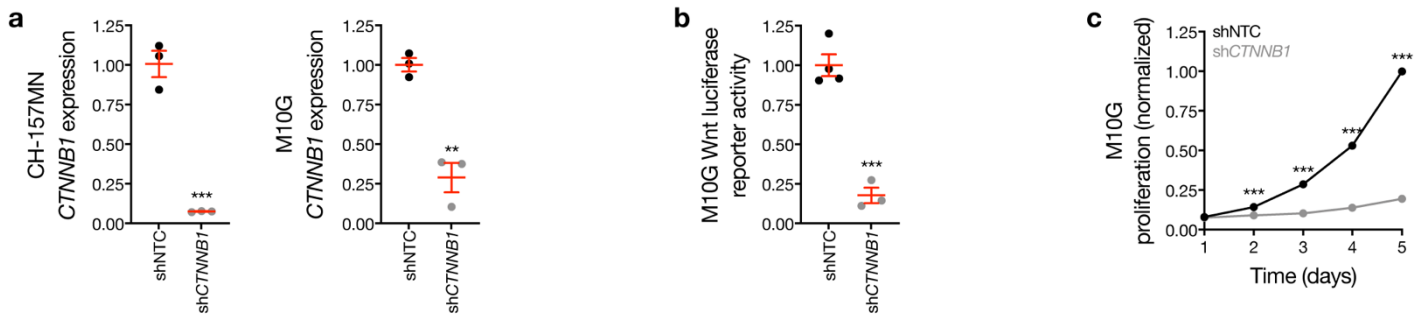

**Supplementary Fig. 7. Wnt pathway inhibition blocks meningioma cell proliferation.** **a**, QPCR for  $\beta$ -catenin (*CTNNB1*) in CH-157MN or M10G meningioma cells expressing non-targeted control shRNAs (shNTC) or shRNAs suppressing  $\beta$ -catenin (shCTNNB1). **b**, TOP-Flash Tcf/Lef luciferase reporter assay in M10G cells expressing shNTC or shCTNNB1 with or without 24-hours of Wnt3a treatment (100ng/ $\mu$ l). **c**, M10G cell MTT assays for cell proliferation with shNTC or shCTNNB1 expression. Lines represent means, and error bar represent standard error of the means. \*\* $P \leq 0.01$ , \*\*\* $P \leq 0.0001$  (Student's t-test, one sided).  $n=3$  biological replicates per condition in all panels. Source data are provided as a Source Data file.
