# Supplementary material for: MerlinS13 phosphorylation regulates meningioma Wnt signaling and magnetic resonance imaging features
Source: PubMed Central journal article supplement (PMC11383945; doi:10.1038/s41467-024-52284-8), 2024-09-09
Supplement: 41467_2024_52284_MOESM3_ESM.pdf [file 41467_2024_52284_MOESM3_ESM.pdf]

## **Description of Additional Supplementary Files**

**Supplementary Data 1. CH-157MN meningioma xenograft single-cell RNA sequencing.**

**Supplementary Data 2. Merlin-APEX2 proximity-labeling proteomic mass spectrometry in M10G meningioma cells.**

**Supplementary Data 3. CH-157MN meningioma xenograft bulk RNA sequencing.**

**Supplementary Data 4. Wnt target gene expression across Merlin-intact human meningiomas.**
